# Supplementary material
Source: publisher site journal article supplement (https://www.dovepress.com/article/577256)
Supplement: Supplementary file 1 [file 577256_20250218%20Supplementary.docx]

| Codes Explanations |
| --- |
| E08.311 Diabetes mellitus due to underlying condition with unspecified diabetic retinopathy with macular edema  E09.311 Drug or chemical induced diabetes mellitus with unspecified diabetic retinopathy with macular edema  E10.311 Type 1 diabetes mellitus with unspecified diabetic retinopathy with macular edema  E11.311 Type 2 diabetes mellitus with unspecified diabetic retinopathy with macular edema  E13.311 Other specified diabetes mellitus with unspecified diabetic retinopathy with macular edema  E08.321 Diabetes mellitus due to underlying condition with mild nonproliferative diabetic retinopathy with macular edema  E09.321 Drug or chemical induced diabetes mellitus with mild nonproliferative diabetic retinopathy with macular edema  E10.321 Type 1 diabetes mellitus with mild nonproliferative diabetic retinopathy with macular edema  E11.321 Type 2 diabetes mellitus with mild nonproliferative diabetic retinopathy with macular edema  E13.321 Other specified diabetes mellitus with mild nonproliferative diabetic retinopathy with macular edema  E08.331 Diabetes mellitus due to underlying condition with moderate nonproliferative diabetic retinopathy with macular edema  E09.331 Drug or chemical induced diabetes mellitus with moderate nonproliferative diabetic retinopathy with macular edema  E10.331 Type 1 diabetes mellitus with moderate nonproliferative diabetic retinopathy with macular edema  E11.331 Type 2 diabetes mellitus with moderate nonproliferative diabetic retinopathy with macular edema  E13.331 Other specified diabetes mellitus with moderate nonproliferative diabetic retinopathy with macular edema  E08.341 Diabetes mellitus due to underlying condition with severe nonproliferative diabetic retinopathy with macular edema  E09.341 Drug or chemical induced diabetes mellitus with severe nonproliferative diabetic retinopathy with macular edema  E10.341 Type 1 diabetes mellitus with severe nonproliferative diabetic retinopathy with macular edema  E11.341 Type 2 diabetes mellitus with severe nonproliferative diabetic retinopathy with macular edema  E13.341 Other specified diabetes mellitus with severe nonproliferative diabetic retinopathy with macular edema  E08.351 Diabetes mellitus due to underlying condition with proliferative diabetic retinopathy with macular edema  E09.351 Drug or chemical induced diabetes mellitus with proliferative diabetic retinopathy with macular edema  E10.351 Type 1 diabetes mellitus with proliferative diabetic retinopathy with macular edema  E11.351 Type 2 diabetes mellitus with proliferative diabetic retinopathy with macular edema  E13.351 Other specified diabetes mellitus with proliferative diabetic retinopathy with macular edema |

**Supplementary Table 1.** List of ICD-10-CM DME codes used in this study
